# Supplementary material for: Linear antiferromagnetism in Ba2CoS3Electronic supplementary information (ESI) available: crystallographic data. See http://www.rsc.org/suppdata/cc/b4/b400084f/
Source: Royal Society of Chemistry journal article supplement (doi:10.1039/b400084f), 2004-01-01
Supplement: b400084f.doc [file b400084f.doc]

| **Formula** | Ba2CoS3 |
| --- | --- |
| **Space Group** | *Pnam no.* 62 |
| ***a* (Å)** | 12.000(1) |
| ***b* (Å)** | 12.470(1) |
| ***c* (Å)** | 4.205(2) |
| ***v* (Å3)** | 629.236(2) |
| ***Z*** | 4 |
| **Calculated density** | 4.535 gm/cm3 |
| **Counting time** | 10s |
| **Step** | 0.02 |
| **Profile function** | pseudo-Voigt |
| **Number of profile points** | 4750 |
| **Number of parameters refined** | 34 |
| **Rp (%)** | 3.70 |
| **Rwp (%)** | 4.71 |
| **Rbragg** | 1.79 |
| **Rexp** | 3.72 |
| **GOF** | 1.60 |

**Table 2.** Atomic Parameters and Standard Deviation for Ba2CoS3

|  | Wyckoff | *x* | *y* | *z* | 100*U*iso | Occ |
| --- | --- | --- | --- | --- | --- | --- |
| Ba1 | 4c | 0.3277(2) | 0.0198(2) | 0.25 | 1.4 | 0.5 |
| Ba2 | 4c | 0.9875(2) | 0.8274(2) | 0.25 | 1.4 | 0.5 |
| Co | 4c | 0.2442(4) | 0.3048(5) | 0.25 | 0.35 | 0.5 |
| S1 | 4c | 0.3657(7) | 0.4503(7) | 0.25 | 1.4 | 0.5 |
| S2 | 4c | 0.0595(7) | 0.3594(8) | 0.25 | 1.4 | 0.5 |
| S3 | 4c | 0.7244(7) | 0.7875(8) | 0.25 | 1.4 | 0.5 |

**Table 3.** Selected Bond Distances and Angles for Ba2CoS3

|  |  | Distances (Å) |  |  |
| --- | --- | --- | --- | --- |
| Ba1-Co | 3.515(4), 3.693(3) |  | Co-S1 | 2.330(3) |
| Ba1-S1 | 3.250(3) |  | Co-S2 | 2.317(3) |
| Ba1-S2 | 3.202(4), 3.163(4) |  | Co-S3 | 2.427(2) |
| Ba1-S3 | 3.253(3) |  |  |  |
| Ba2-Co | 3.855(3) |  |  |  |
| Ba2-S1 | 3.142(4), 3.134(4) |  |  |  |
| Ba2-S2 | 3.188(4) |  |  |  |
| Ba2-S3 | 3.195(3), 3.184(4) |  |  |  |
| Co-Co (intrachain) | 4.205(2) |  |  |  |
| (interchain) | 6.153(3), 6.582(4) |  |  |  |
|  |  | Angles (º) |  |  |
| S1-Co-S2 | 111.71(10) |  | S2-Co-S3 | 106.72(11) |
| S1-Co-S3 | 105.81(8) |  | S3-Co-S3 | 120.11(8) |
